# Supplementary material for: The Italian Validation of the Beck Cognitive Insight Scale: Underlying Factor Structure in Psychotic Patients and the General Population
Source: MDPI journal article supplement (doi:10.3390/ijerph20176634), 2023-08-24
Supplement: s1 [file s1]

Table S1. Internal consistency of BCIS in GP and SZ

|                      | GP               |                  | SZ               |                  |
|----------------------|------------------|------------------|------------------|------------------|
|                      | N=624            |                  | N=130            |                  |
|                      | Cronbach's alpha | McDonald's omega | Cronbach's alpha | McDonald's omega |
| <b>BCIS 15-items</b> | 0.501            | 0.222            | 0.575            | 0.435            |
| <b>SR</b>            | 0.564            | 0.566            | 0.583            | 0.587            |
| <b>SC</b>            | 0.628            | 0.630            | 0.608            | 0.616            |

GP=General population; SZ= Patients with schizophrenia; BCIS=Beck Cognitive Insight Scale; SR=Self-Reflectiveness; SC=Self-Certainty

Table S2. Inter-item correlation of the BCIS in SZ

IT=Item

|              | IT 1   | IT 2   | IT 3   | IT 4   | IT 5   | IT 6   | IT 7   | IT 8   | IT 9  | IT 10  | IT 11 | IT 12 | IT 13  | IT 14 | IT 15 |
|--------------|--------|--------|--------|--------|--------|--------|--------|--------|-------|--------|-------|-------|--------|-------|-------|
| <b>IT 1</b>  | 1      |        |        |        |        |        |        |        |       |        |       |       |        |       |       |
| <b>IT 2</b>  | -0.031 | 1      |        |        |        |        |        |        |       |        |       |       |        |       |       |
| <b>IT 3</b>  | 0.164  | -0.031 | 1      |        |        |        |        |        |       |        |       |       |        |       |       |
| <b>IT 4</b>  | 0.275  | -0.052 | 0.189  | 1      |        |        |        |        |       |        |       |       |        |       |       |
| <b>IT 5</b>  | 0.205  | 0.005  | 0.114  | 0.151  | 1      |        |        |        |       |        |       |       |        |       |       |
| <b>IT 6</b>  | 0.176  | -0.186 | 0.259  | 0.303  | 0.28   | 1      |        |        |       |        |       |       |        |       |       |
| <b>IT 7</b>  | 0.083  | 0.125  | 0.046  | -0.06  | -0.207 | -0.043 | 1      |        |       |        |       |       |        |       |       |
| <b>IT 8</b>  | -0.009 | -0.222 | 0.047  | 0.034  | 0.221  | 0.295  | -0.212 | 1      |       |        |       |       |        |       |       |
| <b>IT 9</b>  | -0.022 | 0.139  | -0.054 | -0.065 | 0.011  | -0.03  | 0.341  | 0.086  | 1     |        |       |       |        |       |       |
| <b>IT 10</b> | 0.082  | 0.121  | 0.099  | 0.085  | -0.003 | 0.007  | 0.316  | 0.014  | 0.169 | 1      |       |       |        |       |       |
| <b>IT 11</b> | 0.307  | 0.046  | -0.014 | 0.219  | 0.114  | 0.082  | 0.18   | 0.088  | 0.072 | 0.295  | 1     |       |        |       |       |
| <b>IT 12</b> | -0.104 | 0.053  | -0.046 | 0.041  | 0.163  | 0.262  | -0.088 | 0.353  | 0.079 | -0.023 | 0.086 | 1     |        |       |       |
| <b>IT 13</b> | -0.037 | 0.371  | 0.062  | -0.004 | 0.07   | -0.061 | 0.211  | -0.081 | 0.333 | 0.346  | 0.076 | 0.109 | 1      |       |       |
| <b>IT 14</b> | 0.172  | 0.105  | 0.051  | 0.088  | 0.08   | 0.1    | 0.018  | 0.176  | 0.096 | -0.026 | 0.135 | 0.25  | 0.072  | 1     |       |
| <b>IT 15</b> | 0.041  | -0.158 | 0.151  | -0.008 | 0.105  | 0.064  | 0.019  | 0.085  | 0.097 | -0.011 | 0.138 | 0.022 | -0.022 | 0.129 | 1     |

Table S3. Inter-item correlation of the BCIS in GP

|       | IT 1   | IT 2   | IT 3   | IT 4   | IT 5   | IT 6   | IT 7   | IT 8   | IT 9  | IT 10  | IT 11  | IT 12 | IT 13 | IT 14 | IT 15 |
|-------|--------|--------|--------|--------|--------|--------|--------|--------|-------|--------|--------|-------|-------|-------|-------|
| IT 1  | 1      |        |        |        |        |        |        |        |       |        |        |       |       |       |       |
| IT 2  | -0.189 | 1      |        |        |        |        |        |        |       |        |        |       |       |       |       |
| IT 3  | 0.003  | 0.077  | 1      |        |        |        |        |        |       |        |        |       |       |       |       |
| IT 4  | 0.321  | -0.111 | 0.15   | 1      |        |        |        |        |       |        |        |       |       |       |       |
| IT 5  | 0.225  | -0.158 | 0.118  | 0.402  | 1      |        |        |        |       |        |        |       |       |       |       |
| IT 6  | 0.344  | -0.207 | 0.08   | 0.252  | 0.413  | 1      |        |        |       |        |        |       |       |       |       |
| IT 7  | -0.022 | 0.308  | 0.012  | 0.073  | -0.028 | -0.081 | 1      |        |       |        |        |       |       |       |       |
| IT 8  | 0.165  | -0.094 | 0.032  | 0.095  | 0.119  | 0.258  | -0.202 | 1      |       |        |        |       |       |       |       |
| IT 9  | -0.011 | 0.261  | -0.099 | -0.001 | -0.029 | -0.118 | 0.278  | -0.036 | 1     |        |        |       |       |       |       |
| IT 10 | -0.015 | 0.176  | 0.028  | 0.049  | 0.069  | -0.008 | 0.297  | -0.06  | 0.151 | 1      |        |       |       |       |       |
| IT 11 | 0.108  | 0.007  | -0.03  | 0.138  | 0.16   | 0.002  | 0.185  | -0.003 | 0.171 | 0.349  | 1      |       |       |       |       |
| IT 12 | -0.041 | 0.034  | -0.103 | -0.085 | -0.054 | -0.047 | -0.014 | 0.178  | 0.078 | -0.107 | -0.099 | 1     |       |       |       |
| IT 13 | -0.186 | 0.347  | -0.028 | -0.16  | -0.164 | -0.183 | 0.307  | -0.093 | 0.317 | 0.157  | 0.033  | 0.16  | 1     |       |       |
| IT 14 | 0.013  | 0.017  | -0.122 | -0.045 | -0.042 | 0.029  | -0.012 | 0.235  | 0.096 | -0.132 | -0.052 | 0.39  | 0.134 | 1     |       |
| IT 15 | 0.265  | -0.089 | -0.039 | 0.249  | 0.281  | 0.197  | -0.01  | 0.156  | 0.049 | 0.063  | 0.155  | 0.024 | -0.08 | 0.051 | 1     |

IT=Item

Table S4. EFA with orthogonal rotation (varimax) of 6 factors solution and internal consistency of 6 factors solution in SZ

EFA= Exploratory Factor Analysis; IT=Item; The items that reach the acceptable factor loading index ( $\geq 0.40$ ) are highlighted in bold

|       | Factors      |              |              |              |              |              | Cronbach's<br>alpha | McDonald's<br>omega |
|-------|--------------|--------------|--------------|--------------|--------------|--------------|---------------------|---------------------|
|       | 1            | 2            | 3            | 4            | 5            | 6            |                     |                     |
| IT 8  | <b>0.648</b> | -0.007       | 0.079        | -0.236       | 0.032        | 0.014        | 0.521               | 0.521               |
| IT 12 | <b>0.6</b>   | 0.029        | -0.002       | 0.097        | -0.004       | 0.147        |                     |                     |
| IT 7  | -0.262       | <b>0.657</b> | -0.016       | 0.018        | 0.133        | 0.023        |                     |                     |
| IT 9  | 0.134        | <b>0.538</b> | -0.07        | 0.122        | -0.015       | 0.101        | 0.534               | 0.570               |
| IT 10 | 0.021        | <b>0.419</b> | 0.115        | 0.188        | 0.329        | -0.368       |                     |                     |
| IT 6  | 0.351        | -0.019       | <b>0.535</b> | -0.173       | 0.041        | 0.03         |                     |                     |
| IT 3  | -0.034       | 0.085        | <b>0.511</b> | -0.033       | -0.043       | -0.002       | 0.500               | 0.511               |
| IT 4  | 0.041        | -0.107       | <b>0.426</b> | 0.008        | 0.274        | 0.015        |                     |                     |
| IT 2  | -0.077       | 0.101        | -0.091       | <b>0.675</b> | 0.031        | 0.12         |                     |                     |
| IT 11 | 0.107        | 0.156        | 0.034        | -0.003       | <b>0.733</b> | 0.042        | 0.470               | 0.470               |
| IT 1  | -0.134       | -0.021       | 0.382        | -0.041       | <b>0.428</b> | 0.23         |                     |                     |
| IT 14 | 0.242        | 0.092        | 0.077        | 0.079        | 0.13         | <b>0.428</b> |                     |                     |
| IT 5  | 0.3          | -0.129       | 0.314        | 0.072        | 0.117        | 0.075        | -                   | -                   |
| IT 13 | 0.11         | 0.416        | 0.077        | 0.561        | 0.006        | -0.106       |                     |                     |
| IT 15 | 0.086        | 0.136        | 0.099        | -0.188       | 0.054        | 0.143        |                     |                     |

Table S5. EFA with orthogonal rotation (varimax) and internal consistency of 4 factors solutions in SZ

|       | Factors      |              |              |               | Cronbach's<br>alpha | McDonald's<br>omega |
|-------|--------------|--------------|--------------|---------------|---------------------|---------------------|
|       | 1            | 2            | 3            | 4             |                     |                     |
| IT 7  | <b>0.721</b> | -0.263       | 0.025        | -0.057        | 0.573               | 0.534               |
| IT 9  | <b>0.662</b> | 0.217        | -0.216       | -0.026        |                     |                     |
| IT 10 | <b>0.601</b> | -0.044       | 0.238        | 0.134         |                     |                     |
| IT 12 | 0.011        | <b>0.766</b> | -0.124       | 0.098         | 0.521               | 0.506               |
| IT 8  | -0.069       | <b>0.693</b> | -0.013       | -0.318        |                     |                     |
| IT 5  | -0.136       | <b>0.473</b> | 0.37         | 0.103         |                     |                     |
| IT 14 | 0.165        | <b>0.462</b> | 0.112        | 0.025         | 0.455               | 0.444               |
| IT 1  | 0.09         | -0.06        | <b>0.708</b> | -0.031        |                     |                     |
| IT 4  | -0.089       | 0.094        | <b>0.686</b> | 0.099         |                     |                     |
| IT 3  | 0.054        | 0.021        | <b>0.473</b> | -0.118        | 0.000               | -0.373              |
| IT 2  | 0.253        | 0.021        | -0.07        | <b>0.759</b>  |                     |                     |
| IT 15 | 0.266        | 0.141        | 0.051        | <b>-0.602</b> |                     |                     |
| IT 11 | 0.409        | 0.104        | 0.455        | -0.075        |                     |                     |
| IT 6  | -0.117       | 0.465        | 0.464        | -0.185        |                     |                     |
| IT 13 | 0.55         | 0.176        | -0.034       | 0.511         |                     |                     |

EFA= Exploratory Factor

Analysis; IT=Item; The items that reach the acceptable factor loading index ( $\geq 0.40$ ) are highlighted in bold

Table S6. EFA with orthogonal rotation (varimax) and internal consistency of 3 factors solution in SZ

|       | Factors      |              |              | Cronbach's<br>alpha | McDonald's<br>omega |
|-------|--------------|--------------|--------------|---------------------|---------------------|
|       | 1            | 2            | 3            |                     |                     |
| IT 13 | <b>0.724</b> | 0.111        | -0.051       | 0.624               | 0.618               |
| IT 9  | <b>0.615</b> | 0.197        | -0.105       |                     |                     |
| IT 7  | <b>0.611</b> | -0.276       | 0.156        |                     |                     |
| IT 10 | <b>0.582</b> | -0.069       | 0.301        |                     |                     |
| IT 2  | <b>0.55</b>  | -0.059       | -0.176       |                     |                     |
| IT 12 | 0.108        | <b>0.751</b> | -0.159       | 0.521               | 0.506               |
| IT 8  | -0.149       | <b>0.721</b> | 0.018        |                     |                     |
| IT 5  | -0.072       | <b>0.47</b>  | 0.303        |                     |                     |
| IT 14 | 0.183        | <b>0.455</b> | 0.116        |                     |                     |
| IT 1  | 0.02         | -0.048       | <b>0.707</b> |                     |                     |
| IT 4  | -0.076       | 0.098        | <b>0.628</b> | 0.509               | 0.487               |
| IT 11 | 0.317        | 0.106        | <b>0.516</b> |                     |                     |
| IT 3  | -0.028       | 0.038        | <b>0.489</b> |                     |                     |
| IT 6  | -0.181       | 0.491        | 0.453        |                     |                     |
| IT 15 | -0.004       | 0.19         | 0.204        |                     |                     |

EFA= Exploratory Factor Analysis; IT=Item; The items that reach the acceptable factor loading index ( $\geq |0.40|$ ) are highlighted in bold

Table S7. EFA with orthogonal rotation (varimax) and internal consistency of 2 factors solution in SZ

|       | Factors      |              | Cronbach's<br>alpha | McDonald's<br>omega |
|-------|--------------|--------------|---------------------|---------------------|
|       | 1            | 2            |                     |                     |
| IT 6  | <b>0.671</b> | -0.169       | 0.610               | 0.607               |
| IT 4  | <b>0.51</b>  | 0.011        |                     |                     |
| IT 5  | <b>0.549</b> | -0.084       |                     |                     |
| IT 8  | <b>0.531</b> | -0.234       |                     |                     |
| IT 1  | <b>0.458</b> | 0.135        |                     |                     |
| IT 11 | <b>0.43</b>  | 0.377        | 0.624               | 0.618               |
| IT 12 | <b>0.425</b> | -0.014       |                     |                     |
| IT 14 | <b>0.404</b> | 0.14         |                     |                     |
| IT 13 | 0.031        | <b>0.687</b> |                     |                     |
| IT 7  | -0.099       | <b>0.657</b> |                     |                     |
| IT 10 | 0.15         | <b>0.626</b> | 0.624               | 0.618               |
| IT 9  | 0.056        | <b>0.562</b> |                     |                     |
| IT 2  | -0.174       | <b>0.52</b>  |                     |                     |
| IT 3  | 0.369        | 0.043        |                     |                     |
| IT 15 | 0.279        | 0.004        |                     |                     |

EFA= Exploratory Factor Analysis; IT=Item; The items that reach the acceptable factor loading index ( $\geq |0.40|$ ) are highlighted in bold

Table S8. EFA with orthogonal rotation (varimax) and internal consistency of 4 factors solution in GP

|       | Factors      |              |              |              | Cronbach's<br>alpha | McDonald's<br>omega |
|-------|--------------|--------------|--------------|--------------|---------------------|---------------------|
|       | 1            | 2            | 3            | 4            |                     |                     |
| IT 5  | <b>0.631</b> | -0.027       | -0.076       | -0.039       | 0.5                 | 0.414               |
| IT 4  | <b>0.58</b>  | 0.034        | -0.11        | -0.053       |                     |                     |
| IT 6  | <b>0.574</b> | -0.166       | 0.052        | -0.115       |                     |                     |
| IT 1  | <b>0.5</b>   | -0.112       | 0.029        | 0.087        |                     |                     |
| IT 15 | <b>0.435</b> | 0.011        | 0.086        | 0.169        |                     |                     |
| IT 7  | 0.012        | <b>0.598</b> | -0.112       | 0.047        | 0.641               | 0.636               |
| IT 13 | -0.23        | <b>0.561</b> | 0.186        | -0.038       |                     |                     |
| IT 2  | -0.211       | <b>0.547</b> | 0.005        | -0.167       |                     |                     |
| IT 9  | -0.015       | <b>0.478</b> | 0.124        | 0.157        |                     |                     |
| IT 10 | 0.111        | <b>0.41</b>  | -0.239       | 0.242        |                     |                     |
| IT 14 | 0.021        | 0.055        | <b>0.653</b> | 0.047        | 0.526               | 0.511               |
| IT 12 | -0.059       | 0.064        | <b>0.572</b> | 0.002        |                     |                     |
| IT 8  | 0.287        | -0.149       | <b>0.345</b> | -0.011       |                     |                     |
| IT 11 | 0.242        | 0.268        | -0.176       | <b>0.479</b> |                     |                     |
| IT 3  | 0.142        | 0.046        | -0.178       | -0.302       |                     |                     |

EFA= Exploratory Factor Analysis; IT=Item; The items that reach the acceptable factor loading index ( $\geq |0.40|$ ) are highlighted in bold

Table S9. EFA with orthogonal rotation (varimax) and internal consistency of 3 factors solution in GP

|       | Factors      |              |              | Cronbach's<br>alpha | McDonald's<br>omega |
|-------|--------------|--------------|--------------|---------------------|---------------------|
|       | 1            | 2            | 3            |                     |                     |
| IT 13 | <b>0.689</b> | -0.006       | -0.128       | 0.666               | 0.667               |
| IT 10 | <b>0.646</b> | 0.062        | -0.166       |                     |                     |
| IT 5  | <b>0.641</b> | -0.197       | 0.02         |                     |                     |
| IT 2  | <b>0.625</b> | -0.076       | 0.013        |                     |                     |
| IT 15 | <b>0.576</b> | 0.096        | 0.115        |                     |                     |
| IT 8  | -0.015       | <b>0.702</b> | -0.088       | 0.630               | 0.628               |
| IT 14 | 0.004        | <b>0.62</b>  | 0.228        |                     |                     |
| IT 11 | -0.279       | <b>0.589</b> | 0.282        |                     |                     |
| IT 1  | 0.14         | <b>0.587</b> | -0.273       |                     |                     |
| IT 7  | -0.29        | <b>0.562</b> | 0.063        |                     |                     |
| IT 3  | 0.327        | <b>0.465</b> | -0.192       | 0.526               | 0.511               |
| IT 6  | 0.064        | 0.025        | <b>0.767</b> |                     |                     |
| IT 4  | -0.033       | 0.028        | <b>0.737</b> |                     |                     |
| IT 12 | 0.386        | -0.195       | <b>0.459</b> |                     |                     |
| IT 9  | 0.103        | -0.02        | -0.288       |                     |                     |

EFA= Exploratory Factor Analysis; IT=Item; The items that reach the acceptable factor loading index ( $\geq |0.40|$ ) are highlighted in bold

Table S10. EFA with orthogonal rotation (varimax) and internal consistency of 2 factors solution in GP

|       | Factors      |              | Cronbach's<br>alpha | McDonald's<br>omega |
|-------|--------------|--------------|---------------------|---------------------|
|       | 1            | 2            |                     |                     |
| IT 5  | <b>0.625</b> | -0.069       | 0.666               | 0.667               |
| IT 4  | <b>0.579</b> | -0.003       |                     |                     |
| IT 6  | <b>0.526</b> | -0.231       |                     |                     |
| IT 1  | <b>0.499</b> | -0.129       |                     |                     |
| IT 15 | <b>0.431</b> | 0.001        |                     |                     |
| IT 7  | 0.052        | <b>0.62</b>  | 0.641               | 0.636               |
| IT 13 | -0.244       | <b>0.501</b> |                     |                     |
| IT 2  | -0.217       | <b>0.488</b> |                     |                     |
| IT 9  | -0.005       | <b>0.469</b> |                     |                     |
| IT 10 | 0.184        | <b>0.469</b> |                     |                     |
| IT 12 | -0.126       | -0.014       | 0.33                |                     |
| IT 3  | 0.115        | -0.006       |                     |                     |
| IT 14 | -0.062       | -0.028       |                     |                     |
| IT 11 | 0.303        | 0.33         |                     |                     |
| IT 8  | 0.207        | -0.209       |                     |                     |

EFA= Exploratory Factor Analysis; IT=Item; The items that reach the acceptable factor loading index ( $\geq |0.40|$ ) are highlighted in bold

**Figure S1.** EFAs path diagram of BCIS in SZ

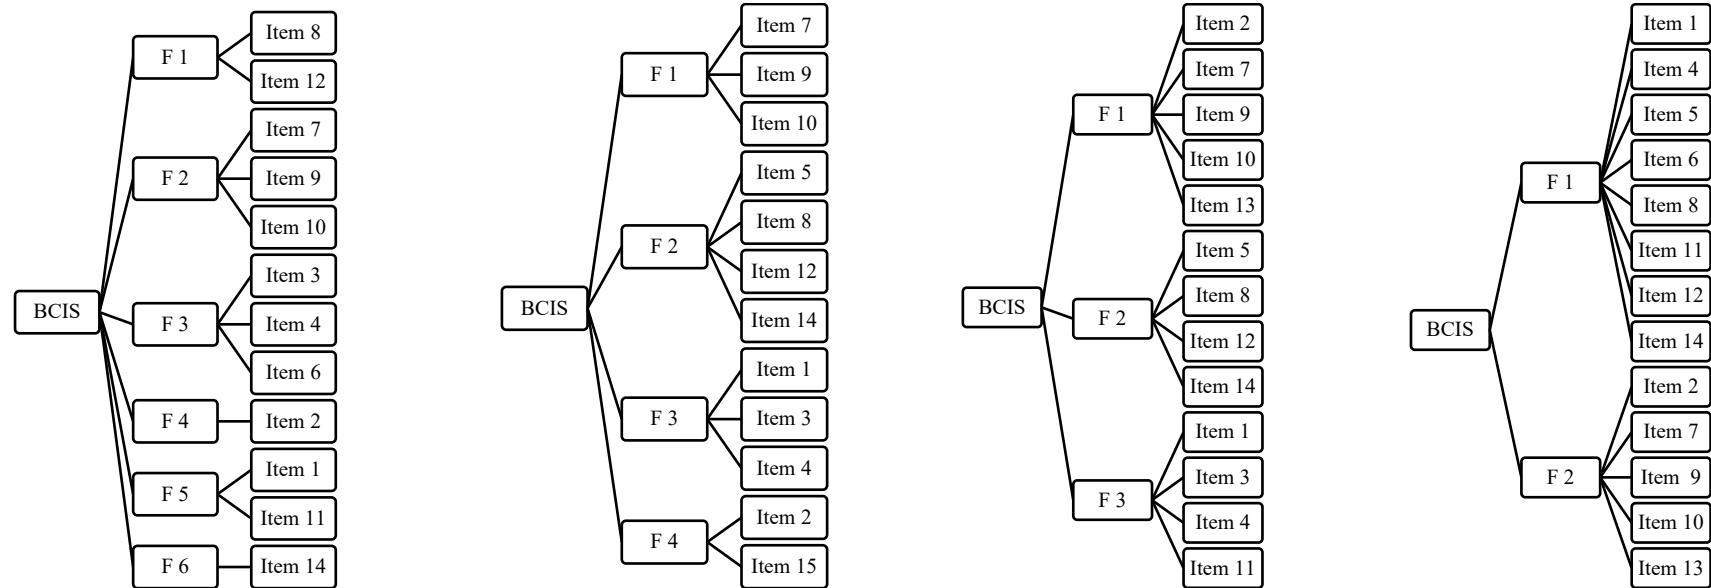

BCIS=Beck cognitive insight scale; F=Factor; SZ= Patients with schizophrenia

**Figure S2.** EFAs path diagram of BCIS in GP

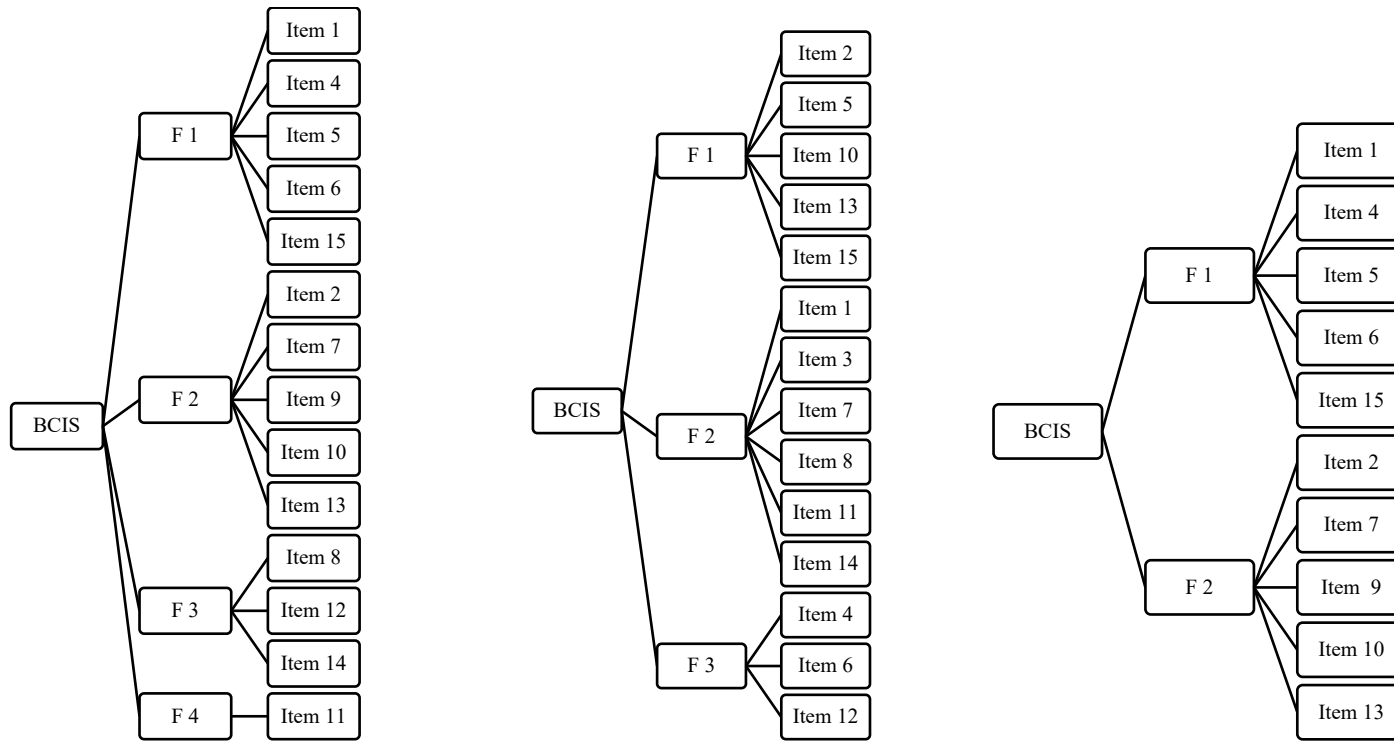

BCIS=Beck cognitive insight scale; F=Factor: GP= General population
